# Supplementary material for: Fabrication of hollow cubic Ag microboxes with net-like nanofiber structures and their surface plasmon resonance
Source: Royal Society of Chemistry journal article supplement (doi:10.1039/c0ce00132e), 2010-09-06
Supplement: c0ce00132e.pdf [file c0ce00132e.pdf]

## Supplementary Information

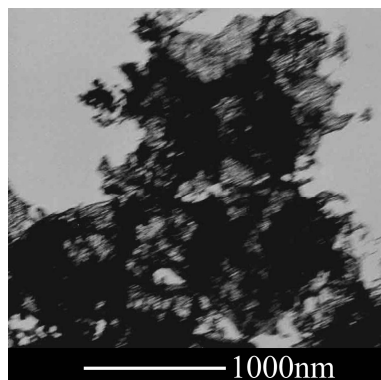

**Fig. S1.** TEM image of the product obtained by using AgCl hollow boxes as precursors with other reaction conditions unchanged.

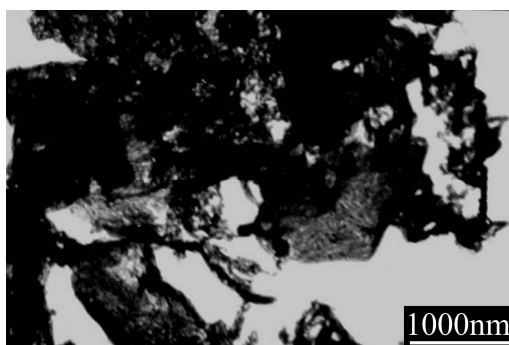

**Fig. S2.** TEM image of the product obtained under acute stirring with other reaction conditions unchanged.

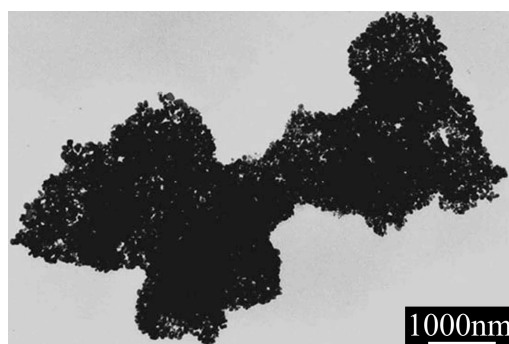

**Fig. S3.** TEM image of the product obtained by using  $\text{NaBH}_4$  as reductant with other reaction conditions unchanged.

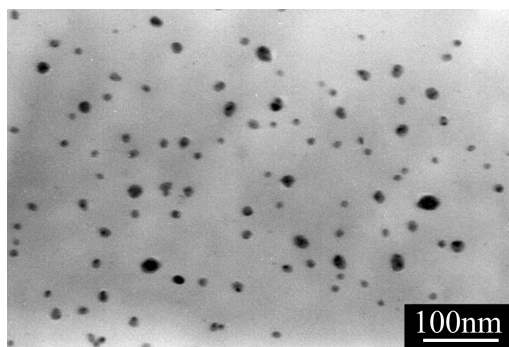

**Fig. S4.** TEM image of dispersive AgCl nanoparticles. They were prepared as follow: 0.3 g PVP was dissolved into 20.0 mL anhydrous ethanol under magnetic stirring in a 50 mL beaker, then 5 mL AgNO<sub>3</sub> (0.05 M ethanolic solution) was added, followed by adding 200  $\mu$ L NaCl solution (5 M) under vigorous stirring, and then keeping on stirring for 15 min in dark to form a AgCl colloid solution. When comparative test was conducted to prepare the netlike Ag nanofibers, the freshly prepared AgCl colloid solution acted as a precursor for the next process, followed by adding ascorbic acid and NaOH solution, and with other process being similar to the procedure of fabricating the hollow cubic Ag boxes.

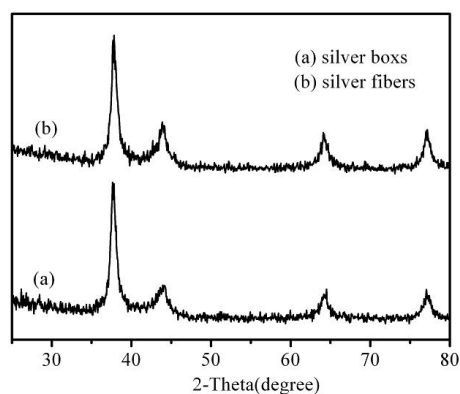

**Fig. S5.** XRD patterns of the Ag boxes and Ag fibers.

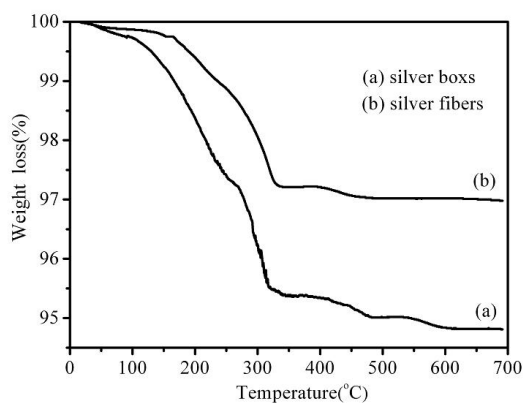

**Fig. S6.** TG curves of the Ag boxes and fibers.

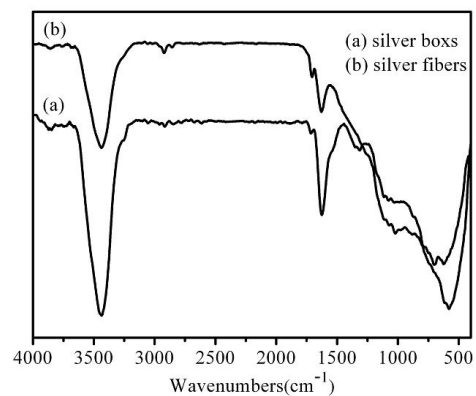

**Fig. S7.** IR curves of the Ag boxes and fibers.

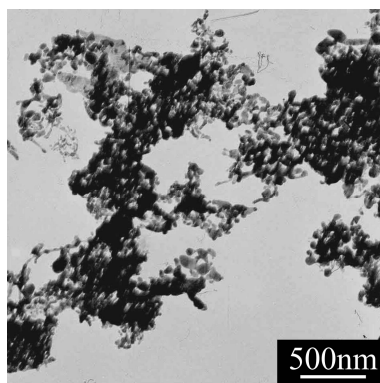

**Fig. S8.** TEM image of the product obtained by using dispersive AgCl nanoparticles as precursors under stirring.
